# Supplementary figures and images for: Application of the Zimm-Bragg Model to the Removal of Azo Dyes with Pectin
Source: Hindawi journal article supplement (doi:10.1155/2021/4947959), 2021-01-01

Pec-Dye-Ca product

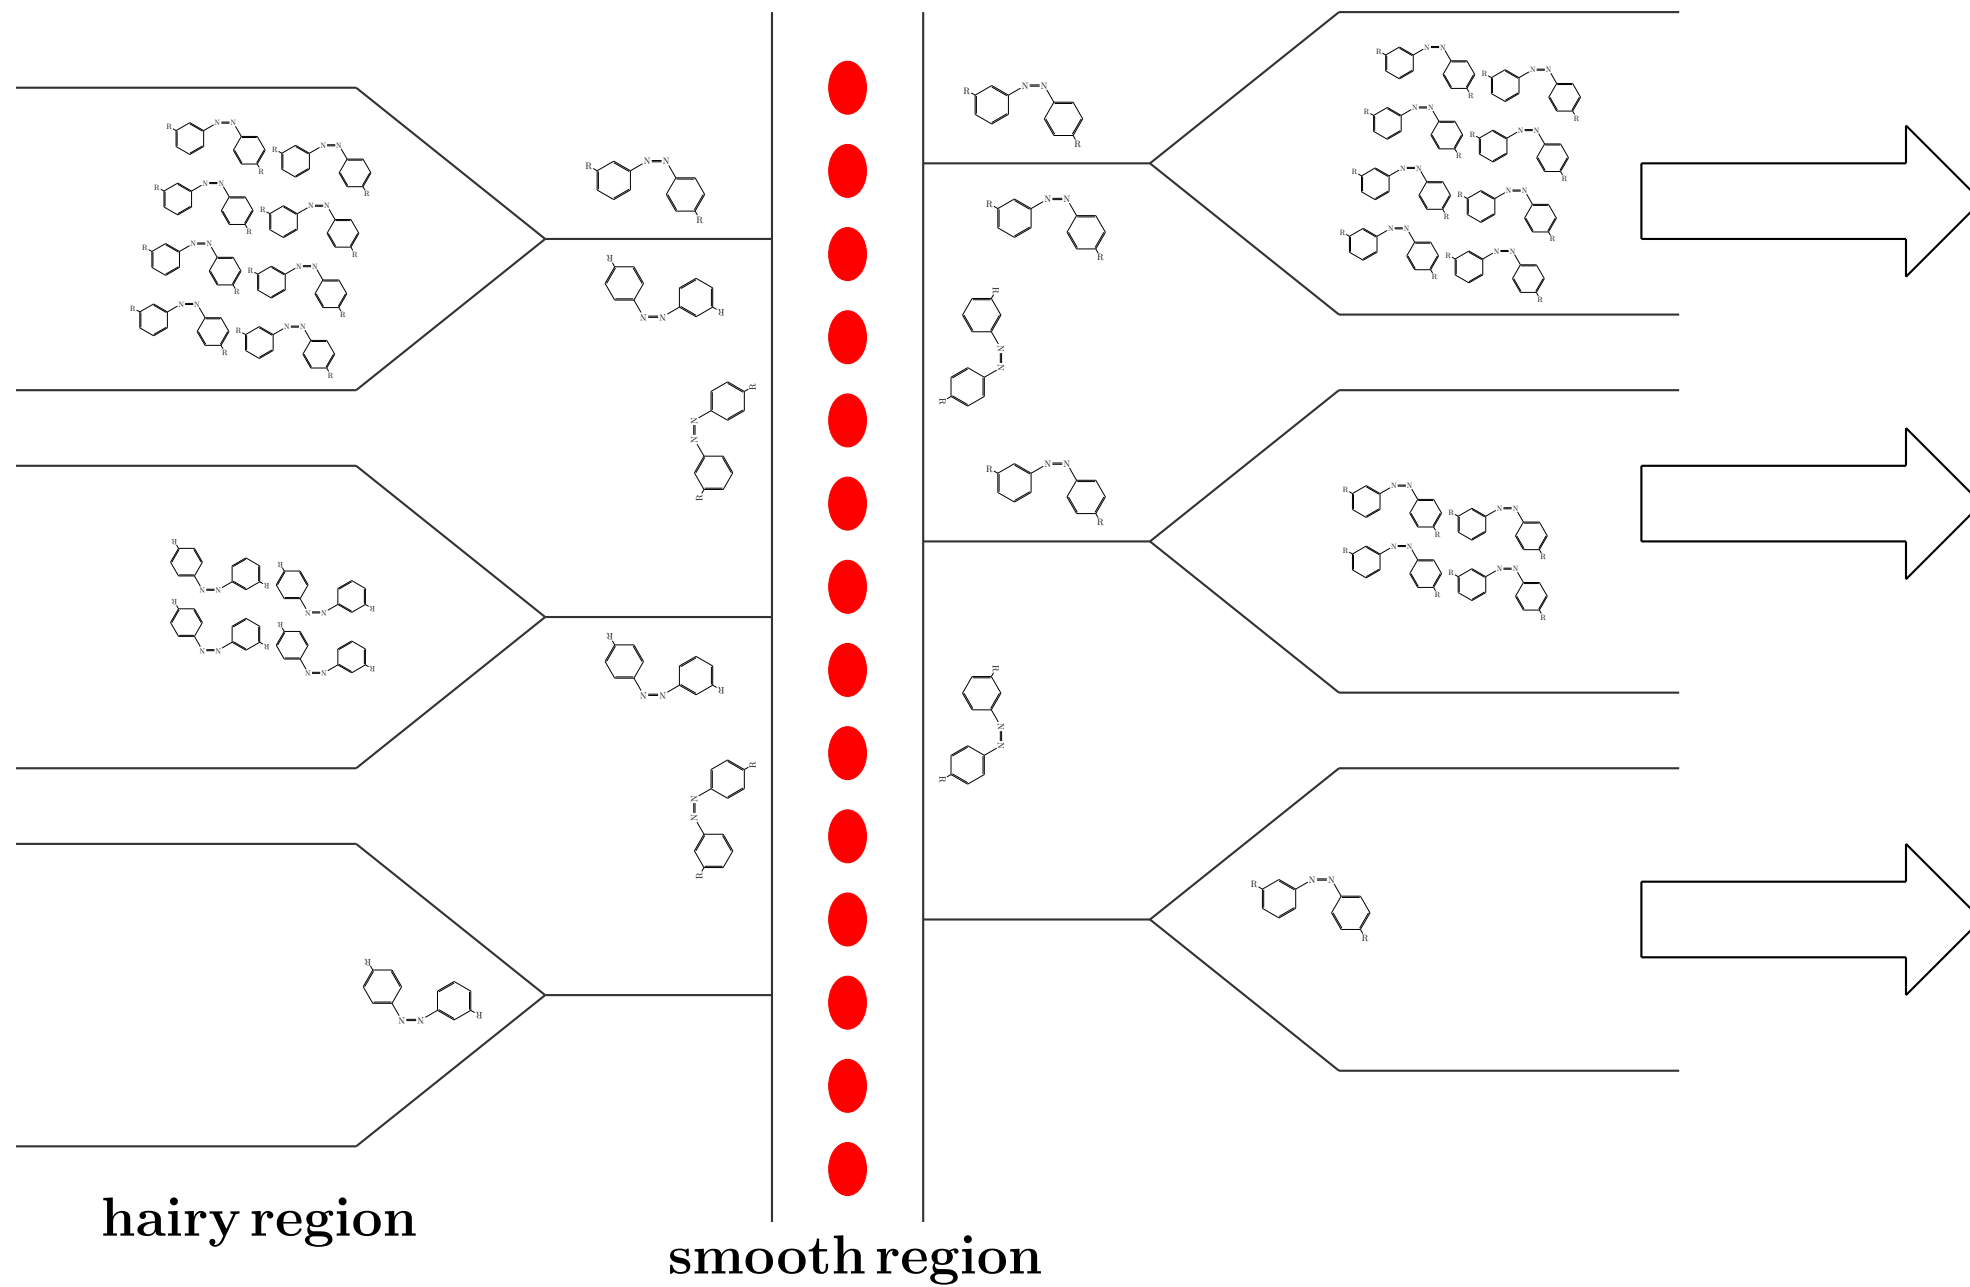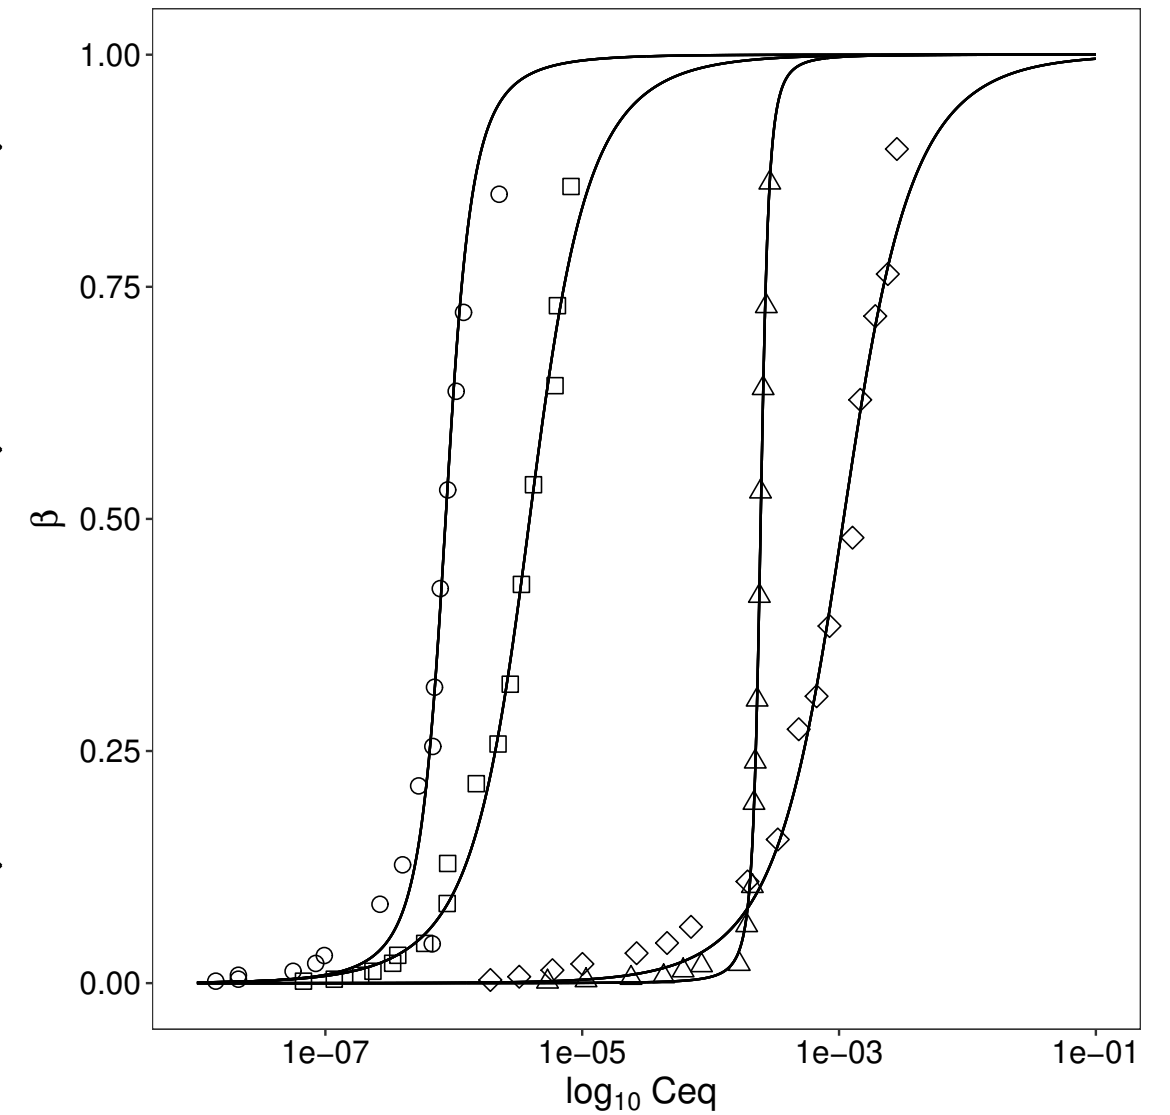

Zimm-Bragg model

Pectin molecule

C1=CC=C(C=C1)/N=N/C2=CC=CC=C2 = Dye molecule

● = Calcium ion

Supplement: f1 [file 4947959.f1.pdf]
